# Supplementary material
Source: Springer Nature journal article supplement (https://www.springermedizin.de/resource/supplementary/12890_2012_411_MOESM1_ESM.pdf/9505136)

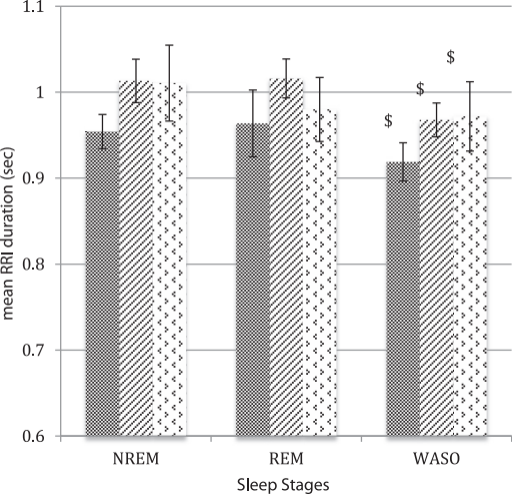

■ SAHS patients before CPAP

▨ SAHS patients with CPAP

◻ Healthy men

Supplement: MOESM1 [file 9505136]
